# Supplementary material for: Comparative study of SPI success factors in global and in-house environment for large-scale software companies
Source: PeerJ journal article supplement (doi:10.7717/peerj-cs.1656), 2023-11-20
Supplement: Questionnaire_for_the_first_survey.pdf [file Questionnaire_for_the_first_survey.pdf]

# Comparative Study of SPI SuccessFactors in Global and In-house Environment for Large Scale Software Companies

I am a student of MS Software Engineering at COMSATS University Islamabad and conducting research for my MS thesis. From the literature, we have identified Software process improvement (SPI) success factors, for large scale software development companies, in case of Global Software development (GSD) and In-house software development. The list of success factors in each case is given below. Please spare some time to add additional success factors (if any) to the lists.

javedkhushi2@gmail.com [Switch account](#)

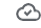

\* Required

Email \*

Your email

Position/Job title: \*

Your answer

Experience in years \*

Your answer

Company's country in which it is located: \*

Your answer

What is primary business function of your company (You can select both as well) \*

- Inhouse software development
- Global software development

**Section-II**

Through the systematic literature review, we have identified the following 35 SPI success factors in GSD context, for large scale software development companies. Please list the additional success factors that you think are important for SPI in GSD context (if any).

| <b>IDs</b>      | <b>Success factors</b>                     | <b>IDs</b>      | <b>Success factors</b>                   |
|-----------------|--------------------------------------------|-----------------|------------------------------------------|
| G <sub>1</sub>  | SPI leadership                             | G <sub>21</sub> | Joint management infrastructure          |
| G <sub>2</sub>  | Efficient project management               | G <sub>22</sub> | SPI consultancy                          |
| G <sub>3</sub>  | Track record of successful projects        | G <sub>23</sub> | Staff involvement                        |
| G <sub>4</sub>  | Political stability                        | G <sub>24</sub> | Organizational culture                   |
| G <sub>5</sub>  | Pilot project performance                  | G <sub>25</sub> | Information Sharing                      |
| G <sub>6</sub>  | Data protection laws                       | G <sub>26</sub> | Senior management commitment and support |
| G <sub>7</sub>  | SPI certification laws                     | G <sub>27</sub> | Organizational infrastructure            |
| G <sub>8</sub>  | Efficient contract management              | G <sub>28</sub> | Overseas site response                   |
| G <sub>9</sub>  | Knowledge of clients' language and culture | G <sub>29</sub> | SPI expertise                            |
| G <sub>10</sub> | Continuous organizational support          | G <sub>30</sub> | Effective requirement analysis           |
| G <sub>11</sub> | SPI standards and procedures               | G <sub>31</sub> | Effective customer involvement           |
| G <sub>12</sub> | Mutual understanding among members         | G <sub>32</sub> | Motivation                               |
| G <sub>13</sub> | Process improvement evaluation             | G <sub>33</sub> | Training                                 |
| G <sub>14</sub> | 3Cs (control, communication, coordination) | G <sub>34</sub> | Risk sharing                             |
| G <sub>15</sub> | Skilled human resources                    | G <sub>35</sub> | Rich technology infrastructure           |
| G <sub>16</sub> | Setting SPI goals                          |                 |                                          |
| G <sub>17</sub> | Reward schemes                             |                 |                                          |
| G <sub>18</sub> | Allocation of resources                    |                 |                                          |
| G <sub>19</sub> | Trust                                      |                 |                                          |
| G <sub>20</sub> | SPI awareness                              |                 |                                          |

Your answer

**Section-III**

Through the systematic literature review, we have identified the following 33 SPI success factors in In-house context, for large scale software development companies. Please list the additional success factors that you think are important for SPI in In-house context (if any).

| <b>IDs</b>      | <b>Success factors</b>                   | <b>IDs</b>      | <b>Success factors</b>       |
|-----------------|------------------------------------------|-----------------|------------------------------|
| I <sub>1</sub>  | Senior management commitment and support | I <sub>20</sub> | Customer Involvement         |
| I <sub>2</sub>  | Staff involvement                        | I <sub>21</sub> | Skills                       |
| I <sub>3</sub>  | Experience of staff                      | I <sub>22</sub> | Time allocation              |
| I <sub>4</sub>  | Training                                 | I <sub>23</sub> | Motivation                   |
| I <sub>5</sub>  | Allocation of resources                  | I <sub>24</sub> | Project managers personality |
| I <sub>6</sub>  | Communication                            | I <sub>25</sub> | Team leader support          |
| I <sub>7</sub>  | SPI goals                                | I <sub>26</sub> | Organizational structure     |
| I <sub>8</sub>  | Tools                                    | I <sub>27</sub> | SPI consultancy              |
| I <sub>9</sub>  | Reward schemes                           | I <sub>28</sub> | Client support               |
| I <sub>10</sub> | Monitoring and feedback                  | I <sub>29</sub> | Employee support             |
| I <sub>11</sub> | SPI leadership and procedures            | I <sub>30</sub> | Participation of top leader  |
| I <sub>12</sub> | Teamwork                                 | I <sub>31</sub> | Automated tools              |
| I <sub>13</sub> | Change management                        | I <sub>32</sub> | Tailoring of process         |
| I <sub>14</sub> | Roles and responsibilities               | I <sub>33</sub> | Managing the project         |
| I <sub>15</sub> | SPI personal respect                     |                 |                              |
| I <sub>16</sub> | Exploitation of existing knowledge       |                 |                              |
| I <sub>17</sub> | SPI awareness                            |                 |                              |
| I <sub>18</sub> | Training and mentoring                   |                 |                              |
| I <sub>19</sub> | Exploration of new knowledge             |                 |                              |

Your answer

Submit

Clear form

Never submit passwords through Google Forms.

This content is neither created nor endorsed by Google. [Report Abuse](#) - [Terms of Service](#) - [Privacy Policy](#)
