# Supplementary material for: Comparative study of SPI success factors in global and in-house environment for large-scale software companies
Source: PeerJ journal article supplement (doi:10.7717/peerj-cs.1656), 2023-11-20
Supplement: Questionnaire_for_the_second_survey.pdf [file Questionnaire_for_the_second_survey.pdf]

# Comparative Study of SPI SuccessFactors in Global and In-house Environment for Large Scale Software Companies

I am a student of MS Software Engineering at COMSATS University Islamabad and conducting research for my MS thesis. For the large scale software development companies, we have identified common success factors of Software process improvement (SPI)\* in case of Global Software development (GSD)\*\* and In-house\*\*\* software development from the literature and survey. The success factors are given below along with Likert scale. Please spare some time to rate the SPI success factors according to their importance in two different scenarios. Please do compare the success factor that is more important in GSD or in In-house

\*Software Process Improvement methodology is defined as a sequence of tasks, tools, and techniques to plan and implement improvement activities to achieve specific goals such as increasing development speed, achieving higher product quality or reducing costs.

\*\*When the distribution of the members of a distributed software development team exceeds the frontiers of a country.

\*\*\*In-house refers to an activity or operation that is performed within a company, instead of relying on outsourcing. The firm uses its own employees and resources to develop a software.

 javedkhushi2@gmail.com (not shared) [Switch account](#)

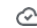

\* Required

Email \*

Your answer

Position/Job title: \*

Your answer

Experience in years \*

Your answer

Company's country in which it is located: \*

Your answer

What is primary business function of your company (You can select both as well) \*

GSD

Inhouse

## Section-II

SPI Leadership

SPI Leadership in GSD \*

1 2 3 4 5

less important      more important

SPI Leadership in inhouse \*

1 2 3 4 5

less important      more important

**Project management**

Project management in GSD \*

1 2 3 4 5

less important      more important

Project management in inhouse \*

1 2 3 4 5

less important      more important

**Communication**

Communication in GSD \*

1 2 3 4 5

less important      more important

Communication in inhouse \*

1 2 3 4 5

less important      more important

**Teamwork**

Teamwork in GSD \*

1 2 3 4 5

less important      more important

**Teamwork in inhouse \***

1 2 3 4 5

less important      more important

**Setting SPI goal**

**Setting SPI goal in GSD \***

1 2 3 4 5

less important      more important

**Setting SPI goal in inhouse \***

1 2 3 4 5

less important      more important

**SPI awareness**

**SPI awareness in GSD \***

1 2 3 4 5

less important      more important

**SPI awareness in inhouse \***

1 2 3 4 5

less important      more important

**Allocation of resources**

**Allocation of resources in GSD \***

1 2 3 4 5

less important      more important

**Allocation of resources in inhouse \***

1 2 3 4 5

less important      more important

**SPI consultancy**

SPI consultancy in GSD \*

|                |                       |                       |                       |                       |                       |                |
|----------------|-----------------------|-----------------------|-----------------------|-----------------------|-----------------------|----------------|
|                | 1                     | 2                     | 3                     | 4                     | 5                     |                |
| less important | <input type="radio"/> | <input type="radio"/> | <input type="radio"/> | <input type="radio"/> | <input type="radio"/> | more important |

SPI consultancy in inhouse \*

|                |                       |                       |                       |                       |                       |                |
|----------------|-----------------------|-----------------------|-----------------------|-----------------------|-----------------------|----------------|
|                | 1                     | 2                     | 3                     | 4                     | 5                     |                |
| less important | <input type="radio"/> | <input type="radio"/> | <input type="radio"/> | <input type="radio"/> | <input type="radio"/> | more important |

**Staff involvement**

Staff involvement in GSD \*

|                |                       |                       |                       |                       |                       |                |
|----------------|-----------------------|-----------------------|-----------------------|-----------------------|-----------------------|----------------|
|                | 1                     | 2                     | 3                     | 4                     | 5                     |                |
| less important | <input type="radio"/> | <input type="radio"/> | <input type="radio"/> | <input type="radio"/> | <input type="radio"/> | more important |

Staff involvement in inhouse \*

|                |                       |                       |                       |                       |                       |                |
|----------------|-----------------------|-----------------------|-----------------------|-----------------------|-----------------------|----------------|
|                | 1                     | 2                     | 3                     | 4                     | 5                     |                |
| less important | <input type="radio"/> | <input type="radio"/> | <input type="radio"/> | <input type="radio"/> | <input type="radio"/> | more important |

**Senior management commitment and support**

Senior management commitment and support in GSD \*

|                |                       |                       |                       |                       |                       |                |
|----------------|-----------------------|-----------------------|-----------------------|-----------------------|-----------------------|----------------|
|                | 1                     | 2                     | 3                     | 4                     | 5                     |                |
| less important | <input type="radio"/> | <input type="radio"/> | <input type="radio"/> | <input type="radio"/> | <input type="radio"/> | more important |

Senior management commitment and support in inhouse \*

|                |                       |                       |                       |                       |                       |                |
|----------------|-----------------------|-----------------------|-----------------------|-----------------------|-----------------------|----------------|
|                | 1                     | 2                     | 3                     | 4                     | 5                     |                |
| less important | <input type="radio"/> | <input type="radio"/> | <input type="radio"/> | <input type="radio"/> | <input type="radio"/> | more important |

**Organizational infrastructure**

Organizational infrastructure in GSD \*

1 2 3 4 5

less important      more important

Organizational infrastructure in inhouse \*

1 2 3 4 5

less important      more important

Customer involvement/ client support

Customer involvement/ client support in GSD \*

1 2 3 4 5

less important      more important

Customer involvement/ client support in inhouse \*

1 2 3 4 5

less important      more important

Motivation

Motivation in GSD \*

1 2 3 4 5

less important      more important

Motivation in inhouse \*

1 2 3 4 5

less important      more important

Training

Training in GSD \*

1 2 3 4 5

less important      more important

Training in inhouse \*

|                |                       |                       |                       |                       |                       |                |
|----------------|-----------------------|-----------------------|-----------------------|-----------------------|-----------------------|----------------|
|                | 1                     | 2                     | 3                     | 4                     | 5                     |                |
| less important | <input type="radio"/> | <input type="radio"/> | <input type="radio"/> | <input type="radio"/> | <input type="radio"/> | more important |

**Reward Schemes**

Reward Schemes in GSD \*

|                |                       |                       |                       |                       |                       |                |
|----------------|-----------------------|-----------------------|-----------------------|-----------------------|-----------------------|----------------|
|                | 1                     | 2                     | 3                     | 4                     | 5                     |                |
| less important | <input type="radio"/> | <input type="radio"/> | <input type="radio"/> | <input type="radio"/> | <input type="radio"/> | more important |

Reward Schemes in inhouse \*

|                |                       |                       |                       |                       |                       |                |
|----------------|-----------------------|-----------------------|-----------------------|-----------------------|-----------------------|----------------|
|                | 1                     | 2                     | 3                     | 4                     | 5                     |                |
| less important | <input type="radio"/> | <input type="radio"/> | <input type="radio"/> | <input type="radio"/> | <input type="radio"/> | more important |

**On time delivery**

On time delivery in GSD \*

|                |                       |                       |                       |                       |                       |                |
|----------------|-----------------------|-----------------------|-----------------------|-----------------------|-----------------------|----------------|
|                | 1                     | 2                     | 3                     | 4                     | 5                     |                |
| less important | <input type="radio"/> | <input type="radio"/> | <input type="radio"/> | <input type="radio"/> | <input type="radio"/> | more important |

On time delivery in inhouse \*

|                |                       |                       |                       |                       |                       |                |
|----------------|-----------------------|-----------------------|-----------------------|-----------------------|-----------------------|----------------|
|                | 1                     | 2                     | 3                     | 4                     | 5                     |                |
| less important | <input type="radio"/> | <input type="radio"/> | <input type="radio"/> | <input type="radio"/> | <input type="radio"/> | more important |

**Easy to understand documentation.**

Easy to understand documentation in GSD \*

|                |                       |                       |                       |                       |                       |                |
|----------------|-----------------------|-----------------------|-----------------------|-----------------------|-----------------------|----------------|
|                | 1                     | 2                     | 3                     | 4                     | 5                     |                |
| less important | <input type="radio"/> | <input type="radio"/> | <input type="radio"/> | <input type="radio"/> | <input type="radio"/> | more important |

Easy to understand documentation in inhouse \*

|                |                       |                       |                       |                       |                       |                |
|----------------|-----------------------|-----------------------|-----------------------|-----------------------|-----------------------|----------------|
|                | 1                     | 2                     | 3                     | 4                     | 5                     |                |
| less important | <input type="radio"/> | <input type="radio"/> | <input type="radio"/> | <input type="radio"/> | <input type="radio"/> | more important |

Submit

Clear form

Never submit passwords through Google Forms.

This content is neither created nor endorsed by Google. [Report Abuse](#) - [Terms of Service](#) - [Privacy Policy](#)

Google Forms

 Request edit access
