# Supplementary material for: Comparative study of SPI success factors in global and in-house environment for large-scale software companies
Source: PeerJ Comput Sci. 2023 Nov 20;9:e1656. doi: 10.7717/peerj-cs.1656 (PMC10703003; doi:10.7717/peerj-cs.1656)
Supplement: Supplemental Information 3 [file peerj-cs-09-1656-s003.xlsx]

## Sheet: in
Timestamp	Email	Position/Job title:	Experience in years	Companyâ€™s country in which it is located:	What is primary business function of your company (You can select both as well)	SPI Leadership in GSD	SPI Leadership in inhouse	Project management in GSD	Project management in inhouse	Communication in GSD	Communication in inhouse	Team work in GSD	Team work in inhouse	Setting SPI goal in GSD	Setting SPI goal in inhouse	SPI awareness in GSD	SPI awareness in inhouse	Allocation of resources in GSD	Allocation of resources in inhouse	SPI consultancy in GSD	SPI consultancy in inhouse	Staff involvement in GSD	Staff involvement in inhouse	Senior management commitment and support in GSD	Senior management commitment and support in inhouse	Organizational infrastructure in GSD	Organizational infrastructure in inhouse	Customer involvement/ client support in GSD	Customer involvement/ client support in inhouse	Motivation in GSD	Motivation in inhouse	Training in GSD	Training in inhouse	Reward Schemes in GSD	Reward Schemes in inhouse	On time delivery in GSD	On time delivery in inhouse	Easy to understand documentation in GSD	Easy to understand documentation in inhouse
2022/05/18 3:47:11 AM PDT	abc	Software Engineer	3	Pakistan	GSD	3	3	2	3	2	2	4	3	2	3	3	2	2	2	3	1	2	3	2	2	3	1	3	2	2	4	2	3	2	3	2	3	2	3
2022/05/18 10:42:33 AM PDT	abc	Software Engineer	4	Pakistan	GSD	5	4	5	4	5	5	5	4	5	5	5	4	5	4	5	3	5	3	5	4	5	4	5	3	5	4	5	5	5	2	5	5	5	4
2022/05/18 10:49:24 AM PDT	abc	Software Quality Assurance	2	Pakistan	Inhouse	2	4	2	5	5	5	2	4	5	5	5	5	1	4	5	5	1	5	5	2	2	5	2	4	5	5	1	5	1	5	5	3	5	4
2022/05/18 11:01:02 AM PDT	abc	Data Annotator	2	Pakistan	GSD	5	5	4	3	3	3	5	5	5	4	5	5	3	5	5	5	4	5	4	4	5	5	5	5	5	5	5	5	4	4	5	5	5	5
2022/05/18 11:01:35 AM PDT	abc	Software Engineer	2	Pakistan	GSD;Inhouse	4	5	4	3	4	5	3	5	4	4	4	4	3	4	4	4	5	5	4	4	4	5	5	5	3	5	5	5	5	5	5	4	4	5
2022/05/18 11:43:30 AM PDT	abc	Product Designer	4	Pakistan	Inhouse	4	5	4	4	3	4	4	4	3	4	4	4	4	4	4	4	3	3	3	3	3	4	4	4	3	5	4	4	4	4	3	4	4	3
2022/05/18 11:43:43 AM PDT	abc	Al engineer	3	United Arab Emirates	Inhouse	4	5	4	5	5	5	4	5	5	4	4	5	4	5	4	4	4	4	4	5	5	4	5	4	4	5	5	5	5	5	5	5	5	5
2022/05/18 11:47:12 AM PDT	abc	Software engineer	4	Pakistani	GSD;Inhouse	4	3	5	4	4	4	4	4	5	4	5	4	4	4	4	4	3	4	4	4	4	2	4	2	4	3	4	4	4	3	4	4	4	4
2022/05/18 11:57:46 AM PDT	abc	Software engineer	3	Pakistan	Inhouse	4	3	5	4	4	5	5	4	5	4	5	3	5	4	5	4	5	2	3	1	4	3	5	4	5	4	3	1	5	4	5	3	5	5
2022/05/18 12:07:43 PM PDT	abc	Software engineer	2	Pakistan	Inhouse	4	5	5	5	5	5	5	4	4	4	3	3	5	5	4	5	5	5	4	4	4	4	3	4	3	5	5	5	5	4	4	3	4	3
2022/05/18 12:58:53 PM PDT	abc	Software engineering	4	Australia	GSD;Inhouse	5	5	4	4	4	5	4	5	4	3	4	3	3	5	5	5	5	4	4	5	5	4	4	3	5	5	5	4	4	4	3	5	5	4
2022/05/18 1:07:16 PM PDT	abc	Project Manager	4	Pakistan	GSD	4	5	5	4	4	4	4	5	4	5	4	4	5	5	4	4	4	5	5	5	3	5	5	5	5	5	5	5	4	5	5	5	5	5
2022/05/18 1:34:48 PM PDT	abc	AI training engineer	1	Pakistan	Inhouse	4	3	4	3	5	5	5	5	4	4	4	4	5	5	4	4	3	4	5	5	5	5	3	3	5	5	4	4	5	5	5	5	5	5
2022/05/18 4:57:23 PM PDT	abc	Web developer	5	Australia	GSD;Inhouse	5	4	5	4	5	4	5	3	4	5	5	4	5	5	5	4	5	4	5	3	5	3	5	4	5	4	5	4	5	4	4	4	4	4
2022/05/18 10:41:50 PM PDT	abc	Data translator	4	Pakistan	GSD	5	3	5	4	5	5	3	5	5	5	5	4	4	5	4	5	5	5	5	5	3	5	5	5	5	3	5	5	5	4	4	5	5	5
2022/05/19 12:52:09 AM PDT	abc	Software engineer	5	Pakistan	Inhouse	3	3	4	4	4	5	5	5	5	3	4	4	4	3	3	3	5	5	4	4	3	3	3	3	5	5	5	5	5	5	4	5	4	4
2022/05/19 5:20:36 AM PDT	abc	Employee	3	Pakistan	GSD	4	4	4	4	5	5	5	4	5	5	4	4	5	4	4	3	4	5	5	4	4	4	4	4	5	3	4	4	4	3	4	4	4	5
2022/05/19 9:14:34 AM PDT	abc	Annotation Quality control lead	1	Pakistan	GSD	4	4	4	4	5	4	5	5	4	4	4	4	4	4	4	4	4	3	4	4	4	4	3	3	4	4	4	4	4	4	4	4	4	4
2022/05/20 5:24:45 AM PDT	abc	Frontend Developer	2	Pakistan	GSD;Inhouse	4	3	4	3	3	3	3	3	3	3	3	3	3	3	3	3	3	3	3	3	3	3	3	3	3	3	3	3	3	3	3	3	3	3
2022/05/20 6:53:29 AM PDT	abc	Project manager	2	UK	Inhouse	4	2	5	4	5	5	5	5	4	4	3	3	4	4	2	3	5	5	4	4	5	3	3	4	4	4	4	4	3	3	5	5	4	4
2022/05/20 8:06:24 AM PDT	abc	AI Training Engineer	2	pakistan	Inhouse	3	3	3	3	3	3	3	3	3	3	3	3	3	3	3	3	3	3	3	3	3	3	3	3	3	3	3	3	3	3	3	3	3	3
2022/05/20 9:07:18 AM PDT	abc	AI Training Engineer	1	Pakistan	GSD	4	4	5	5	5	3	5	5	5	4	5	5	5	5	5	5	5	4	5	4	5	5	4	4	5	5	4	5	4	5	5	5	5	5
2022/05/21 1:00:13 AM PDT	abc	AI Trainee Engineer	2	Pakistan	Inhouse	4	4	4	3	3	4	4	4	3	5	4	4	5	5	4	5	4	3	4	3	4	4	4	4	4	4	4	4	3	4	5	4	5	5
2022/05/21 1:20:42 AM PDT	abc	QA engineer	1	Pakistan	Inhouse	5	5	1	5	5	5	5	5	5	5	5	5	5	5	5	5	5	5	5	5	5	5	5	5	5	5	5	5	5	5	5	5	5	5
2022/05/21 1:25:45 AM PDT	abc	Software engineer	3	Pakistan	GSD;Inhouse	5	5	5	4	4	4	5	5	4	4	5	4	4	4	3	3	2	2	5	5	5	5	3	3	5	5	5	5	5	5	5	5	5	5
2022/05/21 1:46:03 AM PDT	abc	React Native developer	2.5	Islamabad	GSD;Inhouse	4	5	5	4	5	4	5	5	5	5	4	4	4	4	4	5	4	5	4	5	5	5	4	4	4	5	4	4	5	4	5	4	4	4
2022/05/21 5:08:44 AM PDT	abc	Free Lancer	4	Multinational	GSD	5	3	4	4	5	5	5	4	5	4	4	4	5	3	4	4	3	4	5	4	3	5	5	5	5	5	5	4	5	5	5	4	5	3
2022/05/21 8:46:28 AM PDT	abc	Associate Software Engineer	1.7	Islamabad	Inhouse	4	4	5	5	5	5	5	5	4	4	3	3	5	5	3	3	4	4	4	4	5	1	5	2	4	5	5	3	5	5	5	5	5	5
2022/05/21 9:34:34 AM PDT	abc	Project Coordinator	2	Canada	GSD;Inhouse	5	5	5	5	5	5	5	5	5	5	5	5	5	5	5	5	4	4	4	5	3	3	5	5	5	5	5	5	5	5	5	5	5	5
